# Supplementary material
Source: PubMed Central journal article supplement (PMC3236069)

# SCPnet robustness to attack and failure

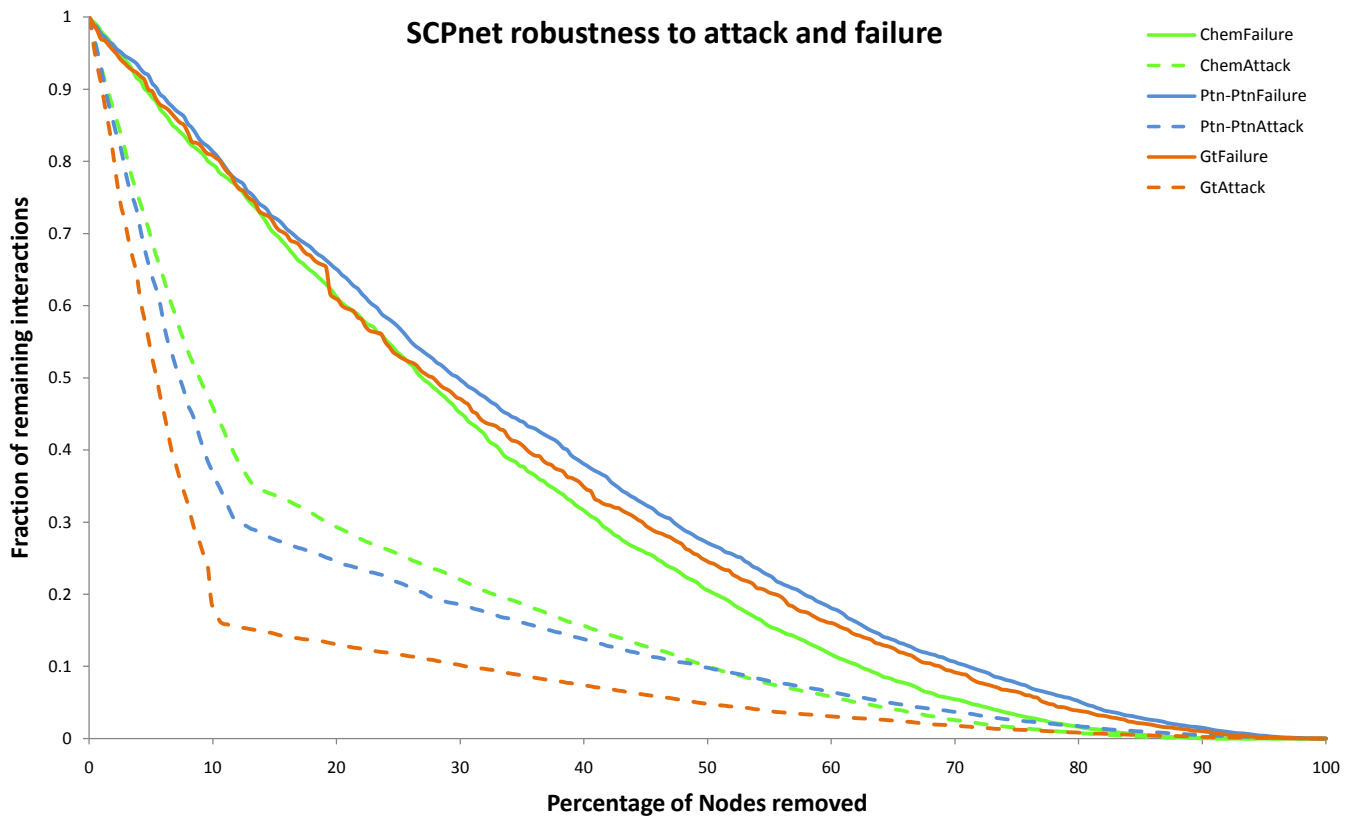

Supplement: NIHMS329944-supplement-3.pdf [file NIHMS329944-supplement-3.pdf]

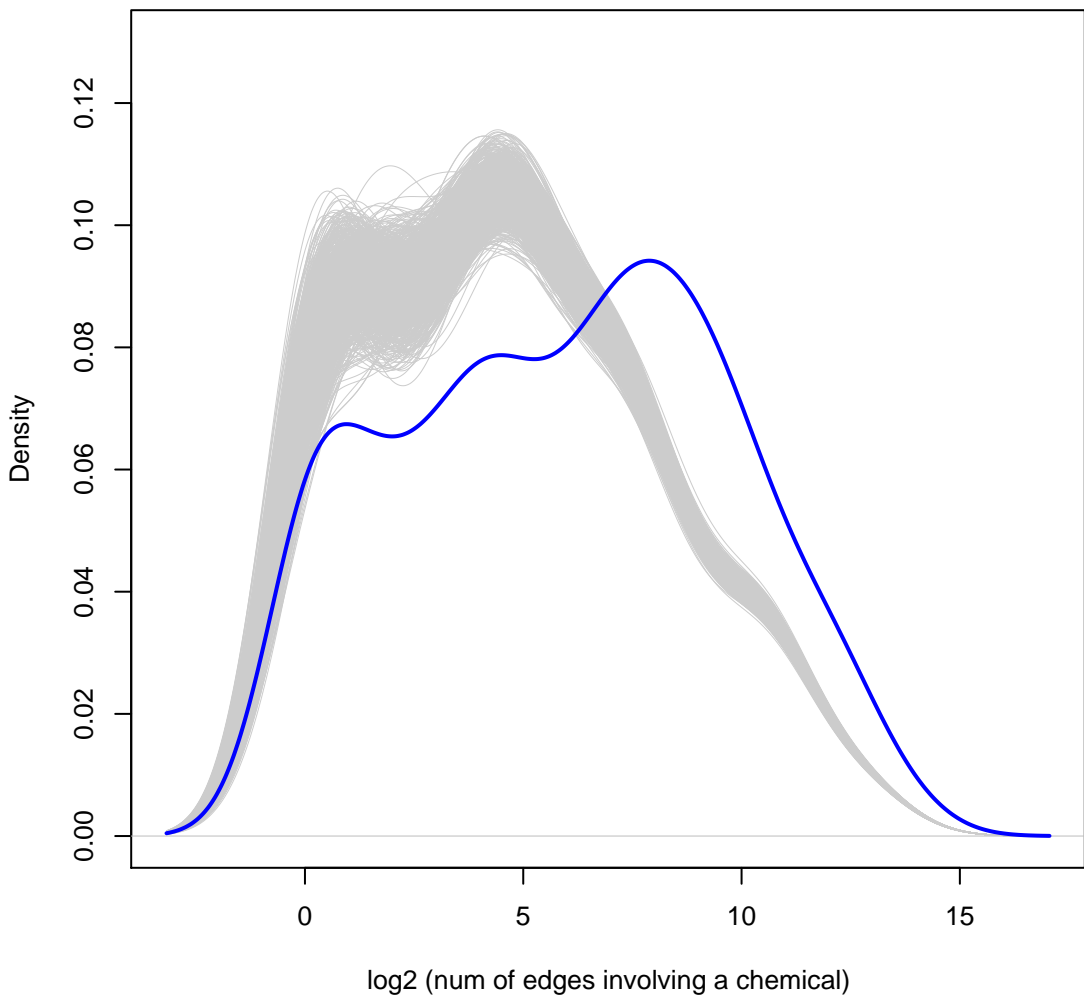

Supplement: NIHMS329944-supplement-4.pdf [file NIHMS329944-supplement-4.pdf]
